# Supplementary material
Source: publisher figshare collection journal article supplement (https://acs.figshare.com/ndownloader/files/4606555)
Supplement: Supplementary file 1 [file 4606555]

## Supporting information

Manuscript: Gas-Liquid Equilibrium Data for Mixture Gas of Sulfur Dioxide + Nitrogen with Ethylene Glycol Aqueous Solutions at 298.15 K and 123.15 kPa

### *1 Desorption properties*

The desorption runs were carried with EGWs dissolving SO<sub>2</sub>, preheated to 333.15 K, and stirred by an agitator at atmospheric pressure for 20 min shown in **Table 1**.

Table 1 Desorption data of EGWs dissolving SO<sub>2</sub>

| 100 $\Phi_1$            | 100 | 90 | 80 | 70 | 60 | 50 | 40 | 20 | 0  |
|-------------------------|-----|----|----|----|----|----|----|----|----|
| Desorption efficiency/% | 95  | 83 | 91 | 91 | 85 | 86 | 82 | 80 | 82 |

### *2 Surface tension and Viscosities of EGWs*

The drop-volume method was employed to measure surface tension,  $\gamma$ , for binary mixtures of EG with water over the whole composition range. All samples were equilibrated to  $T = (308.15, 313.15, 318.15, \text{ and } 323.15) \pm 0.02$  K under atmospheric pressure. The surface tension of solution is acquired by

$$\gamma = \frac{V \rho g}{r} F \quad (1)$$

where  $V$ ,  $\rho$ ,  $g$ ,  $r$ , and  $F$  denotes volume of solution, density of solution, acceleration of gravity, radius of titrating head ( $2r = 4.451$  mm), and emendation factor, respectively.

The viscosities were determined at  $T = (308.15, 313.15, 318.15, \text{ and } 323.15) \pm 0.02$  K with a capillary viscometer of Ubbelohde type which was checked by

measurement of the viscosity of pure water. The flow-time measurements were made using an accurate stopwatch with a precision of  $\pm 0.01$  s. The average of five or six sets of flow times for each fluid was taken for the purpose of the calculation of viscosity. The flow times were reproducible to  $\pm 0.06$  s.

Surface tensions of various aqueous solutions of EG were determined at 308.15 K, 313.15 K, 318.15 K, and 323.15 K, and the results are listed in **Table 2** and plotted as a function of EG concentration in **Figure 1**.

Table 2 Experimental surface tension,  $\gamma$ , of EG (1) + water (2) at different molar fractions of EG ( $x_1$ )

| $x_1$  | $\gamma / (\text{mN}\cdot\text{m}^{-1})$ |              |              |              |
|--------|------------------------------------------|--------------|--------------|--------------|
|        | T/K = 308.15                             | T/K = 313.15 | T/K = 318.15 | T/K = 323.15 |
| 0.0000 | 71.023                                   | 69.657       | 67.676       | 66.125       |
| 0.0145 | 69.732                                   | 66.552       | 65.925       | 63.244       |
| 0.0312 | 67.829                                   | 65.577       | 63.916       | 60.584       |
| 0.0484 | 66.131                                   | 64.095       | 62.244       | 59.621       |
| 0.0686 | 64.568                                   | 62.512       | 60.569       | 57.964       |
| 0.0883 | 63.274                                   | 61.325       | 59.211       | 56.767       |
| 0.1107 | 62.145                                   | 60.324       | 58.412       | 55.754       |
| 0.1621 | 60.017                                   | 58.103       | 56.253       | 54.153       |
| 0.2247 | 57.515                                   | 55.923       | 54.356       | 52.152       |
| 0.3032 | 56.034                                   | 54.446       | 52.663       | 50.524       |
| 0.4035 | 54.026                                   | 52.412       | 50.648       | 49.124       |
| 0.5366 | 52.470                                   | 50.701       | 49.336       | 47.875       |
| 1.0000 | 50.114                                   | 48.732       | 47.254       | 46.406       |

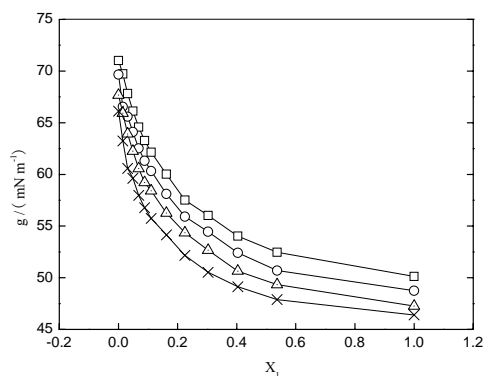

Figure 1 Surface tension of EG (1) + water (2) as a function of temperature at

different molar fractions of EG ( $x_1$ ): □ 308.15 K; ○ 313.15 K; △ 318.15 K; × 323.15 K.

Viscosities of EGWs were determined and the experimental results are shown in **Table 3** and plotted in **Figure 2**.

Table 3 Experimental viscosities,  $\eta$ , for EG (1) + water (2) at different mole fractions of EG ( $x_1$ )

| $x_1$  | $\eta/\text{mPa}\cdot\text{s}$ |              |              |              |
|--------|--------------------------------|--------------|--------------|--------------|
|        | T/K = 308.15                   | T/K = 313.15 | T/K = 318.15 | T/K = 323.15 |
| 0.0000 | 0.7210                         | 0.6532       | 0.5900       | 0.5500       |
| 0.0145 | 0.7542                         | 0.7037       | 0.6336       | 0.5878       |
| 0.0312 | 0.8381                         | 0.7640       | 0.6785       | 0.6321       |
| 0.0484 | 0.9241                         | 0.8372       | 0.7424       | 0.6876       |
| 0.0686 | 1.0212                         | 0.9256       | 0.7995       | 0.7433       |
| 0.0883 | 1.1333                         | 1.0174       | 0.8755       | 0.8133       |
| 0.1107 | 1.2665                         | 1.1266       | 0.9589       | 0.8853       |
| 0.1621 | 1.5744                         | 1.4047       | 1.1838       | 1.0818       |
| 0.2247 | 2.0363                         | 1.7717       | 1.4800       | 1.3388       |
| 0.3032 | 2.6616                         | 2.2976       | 1.8883       | 1.6786       |
| 0.4035 | 3.5116                         | 3.0166       | 2.4683       | 2.1786       |
| 0.5366 | 4.6996                         | 4.0541       | 3.2830       | 2.8736       |
| 1.0000 | 9.2122                         | 7.9605       | 6.2933       | 5.4468       |

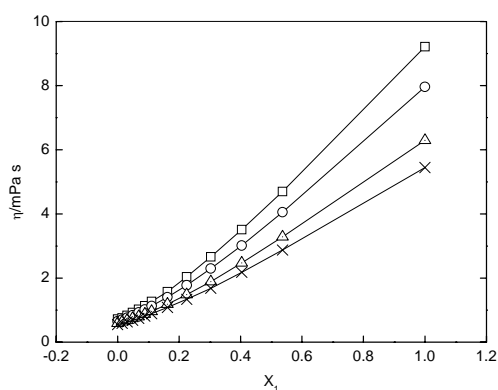

Figure 2 Experimental viscosities of EG (1) + water (2) as a function of temperature at different molar fractions of EG ( $x_1$ ): □, 308.15 K; ○, 313.15 K; △, 318.15 K; ×, 323.15 K.
